# Supplementary material
Source: publisher site journal article supplement (https://www.dovepress.com/article/217570)
Supplement: Supplementary file 1 [file get_supplementary_file.php]

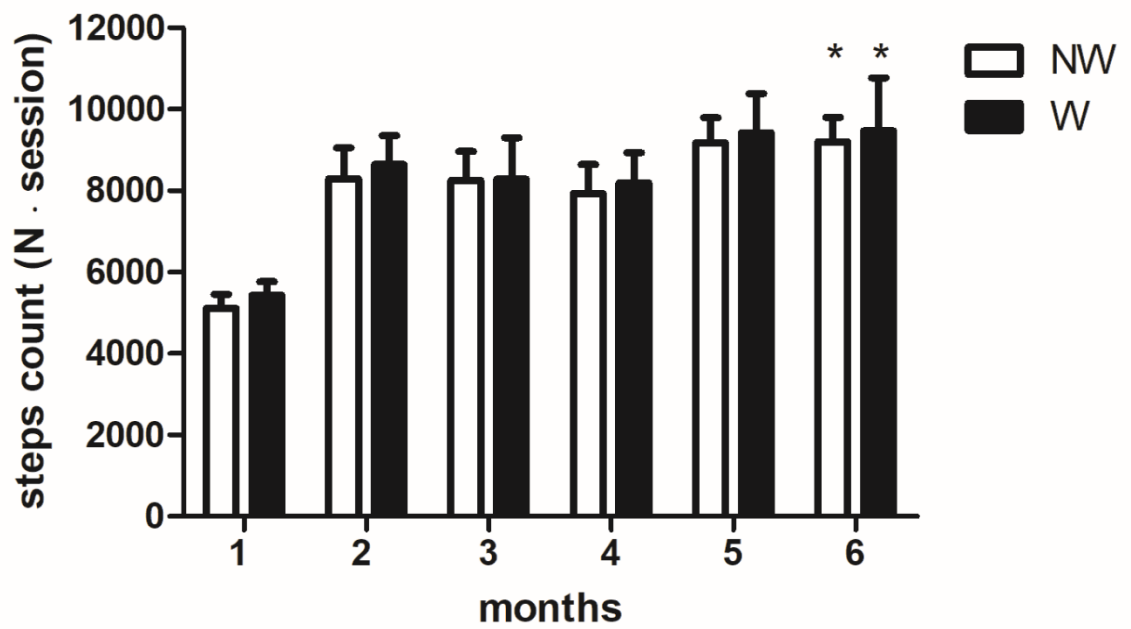

**Supplementary Figure 1:** Monthly number of steps count reached by NW and W group in the training sessions. \*  $p < 0.05$ , significant differences from baseline.
